# Supplementary material
Source: Springer Nature journal article supplement (https://www.springermedizin.de/resource/supplementary/12889_2009_2097_MOESM4_ESM.pdf/9484574)
Supplement: MOESM4 [file 9484574]

Total number of deaths registered in 2005 & 2006 by Sentinel GPs in Belgium  
n=2690

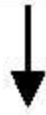

- Deaths excluded because of too much missing data (n=41)
- All deaths in hospital, palliative care unit, public road, workplace and other places (n=1287)

Deaths in general practice (at home or in care home)  
n=1362

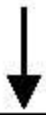

- Sudden and totally unexpected deaths n=507

Non-sudden deaths in general practice (at home or in care home)  
n=855

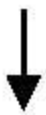

- Patient did not die following life-ending drug use without patient's explicit request n=835
- Question was left unanswered n=3

Non-sudden deaths in general practice following life-ending drug use without patient's explicit request eligible for interview  
n=17

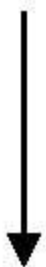

- GP refused to take part in interview (n=1)
- Missing data because of methodological reasons (n=3)
  - Maximum of 1 interview per GP every 2 months was reached (n=1)
  - Case was identified after closing the interview period (n=1)
  - Interviewed GP was not the attending physician in last week of the patient's life (n=1)

Number of valid interviews  
n=13
